# Supplementary material for: Localized cardiolipin synthesis is required for the assembly of MreB during the polarized cell division of Chlamydia trachomatis
Source: PubMed Central journal article supplement (PMC9499288; doi:10.1371/journal.ppat.1010836), 2022-09-12
Supplement: ppat.1010836.s001.pdf [file ppat.1010836.s001.pdf]

**S1 Table. List of Plasmids and Primers**

| Plasmid                                    | Relevant genotype                                                      | Ori   | Source or Reference |
|--------------------------------------------|------------------------------------------------------------------------|-------|---------------------|
| pBOMB4-Tet::L2                             | <i>bla Ptet::mCherry P<sub>Nm</sub>::gfp</i>                           | pUC19 | 1                   |
| pBOMB-cl <sub>s</sub> _6xH::L2             | <i>bla Ptet::cls_6xH P<sub>Nm</sub>::gfp</i>                           | pUC19 | This study          |
| pBOMB-ΔN25_cl <sub>s</sub> _6xH::L2        | <i>bla Ptet::ΔN25_cl<sub>s</sub>_6xH P<sub>Nm</sub>::gfp</i>           | pUC19 | This study          |
| pBOMB-psdD_6xH::L2                         | <i>bla Ptet::psdD_6xH P<sub>Nm</sub>::gfp</i>                          | pUC19 | This study          |
| pTLR2- <i>mreB</i> _6xH                    | <i>bla Ptet::mreB_6xH P<sub>dnaKmut</sub>::mKate2</i>                  | ColE1 | 2                   |
| pBOMBmC::L2                                | <i>bla Ptet::mCherry P<sub>Nm</sub>::mCherry</i>                       | pUC19 | 3                   |
| pBOMBmC-cl <sub>s</sub> _TM_GFP::L2        | <i>bla Ptet::cls_TM_GFP P<sub>Nm</sub>::mCherry</i>                    | pUC19 | This study          |
| pBOMB-cl1orf83_6xH::L2                     | <i>bla Ptet::cl1orf83_6xH P<sub>Nm</sub>::gfp</i>                      | pUC19 | This study          |
| pBOMB-cl <sub>s</sub> _TM_cl1orf83_6xH::L2 | <i>bla Ptet::cls_TM_cl1orf83_6xH P<sub>Nm</sub>::gfp</i>               | pUC19 | This study          |
| pBOMB-TM_cl1orf83_6xH::L2                  | <i>bla Ptet::TM<sub>Ec</sub>_OppB_cl1orf83_6xH P<sub>Nm</sub>::gfp</i> | pUC19 | This study          |
| pBOMB-TM_mCherry::L2                       | <i>bla Ptet::TM<sub>Ec</sub>_OppB_mCherry P<sub>Nm</sub>::gfp</i>      | pUC19 | This study          |
| pSTM25                                     | <i>aadA Plac::t25-TM<sub>Ec</sub>_OppB</i>                             | p15A  | 4                   |
| pSTM25-cl <sub>s</sub>                     | <i>aadA Plac::t25-TM<sub>Ec</sub>_OppB-cl<sub>s</sub></i>              | p15A  | This study          |

| Primer name         | Sequence                                                                      | Features                                                              | Usage                                |
|---------------------|-------------------------------------------------------------------------------|-----------------------------------------------------------------------|--------------------------------------|
| cls/(pBOMB)/5'      | gatctaaagaggagaaaggatctgcATGAAA<br>ATGGCTTTTTTACG                             | lower case for plasmid overlap construction                           | For amplification of cls into pBOMB  |
| cls_6xH/(pBOMB)/3'  | tttgaatggtcgaccggtacctgcattaatggtgatggtgatggtgAGATGGCATGTATCTCTG<br>TTC       | lower case for plasmid overlap construction; adds 6xH sequence to cls | For amplification of cls into pBOMB  |
| psdD/(pBOMB)/5'     | gatctaaagaggagaaaggatctgcATGGCAG<br>CGCGGGAAATG                               | lower case for plasmid overlap construction                           | For amplification of psdD into pBOMB |
| psdD_6xH/(pBOMB)/3' | tttgaatggtcgaccggtacctgcattaatggtgatggtgatggtgTGAAGAGAAACGTTTTCC<br>TAACGATTG | lower case for plasmid overlap construction; adds 6xH sequence to cls | For amplification of psdD into pBOMB |
| cls/(pSTM25)/5'     | acgcacaagggcctctagagATAGCTATTC<br>CGGATGGAG                                   | lower case for plasmid overlap construction                           | For amplification of cls into pSTM25 |

|                         |                                                      |                                                   |                                                   |
|-------------------------|------------------------------------------------------|---------------------------------------------------|---------------------------------------------------|
| cls/(pSTM25)/3'         | attcttagttacttaggtacttaAGATGGCATG<br>TATCTC          | lower case for<br>plasmid overlap<br>construction | For<br>amplification<br>of cls into<br>pSTM25     |
| N26-<br>cls/(pBOMB)/5'  | aaagaggagaaaggatctgcATGGCTATTC<br>CGGATGGAGAC        | lower case for<br>plasmid overlap<br>construction | For<br>amplification<br>of ΔN25_cls<br>into pBOMB |
| cls_TM/(pBOMBm<br>C)/5' | aaagaggagaaaggatctgcATGAAAATG<br>GCTTTTTTACGG        | lower case for<br>plasmid overlap<br>construction | For<br>amplification<br>of cls_TM<br>fragment     |
| cls_TM/(GFP)/3'         | ctcctttactAGTGTGCGCAAACCAT<br>TC                     | lower case for<br>overlap with GFP                | For<br>amplification<br>of cls_TM<br>fragment     |
| GFP/(cls_TM)/5'         | tgcgcacactAGTAAAGGAGAAGCAC<br>TTTTTC                 | lower case for<br>overlap with<br>cls_TM          | For<br>amplification<br>of GFP                    |
| GFP/(pBOMB)/3'          | tttgaatggtcgaccggtacTTATTTGTATA<br>GTTTCATCCATGCCATG | lower case for<br>plasmid overlap<br>construction | For<br>amplification<br>of GFP                    |
| ct284 cls qPCR F        | CACCTGTTGGCCGCTATTA                                  |                                                   | Transcript<br>analysis                            |
| ct284 cls qPCR R        | GCGCTGAAGAACTGTGGATA                                 |                                                   | Transcript<br>analysis                            |
| ct446 euo qPCR F        | CGAAGACTACTCGTTGGGAAAT<br>A                          |                                                   | Genomic<br>DNA<br>quantification                  |
| ct446 euo qPCR R        | AACAGAAGCTCTCCTTGATAAGT                              |                                                   | Genomic<br>DNA<br>quantification                  |

| gBlock name                     | Sequence                                                                                                                                                                                                                                                                                                                                                                                                       | Features                                                                                 | Usage                                                           |
|---------------------------------|----------------------------------------------------------------------------------------------------------------------------------------------------------------------------------------------------------------------------------------------------------------------------------------------------------------------------------------------------------------------------------------------------------------|------------------------------------------------------------------------------------------|-----------------------------------------------------------------|
| c11orf83_6xH<br>(pBOMB)         | aaagaggagaaaggatctgcATGGACTCACT<br>CCGTAAGATGTTAATATCCGTCGC<br>TATGCTTGGAGCTGGTGCAGGTGT<br>TGGCTACGCATTACTAGTTATCGT<br>GACCCCGGCGAACGCAGAAAAC<br>AGGAAATGCTCAAGGAAATGCCT<br>TTACAGGACCCACGTTCAAGAGA<br>AGAAGCGGCCCGAACGCAACAGT<br>TACTCTTAGCAACCTTACAGGAAG<br>CTGCTACAACACAGGAGAATGTT<br>GCCTGGAGAAAAAATTGGATGGT<br>AGGTGGGGAAGGCGGTGCAGGTG<br>GAAGATCCCCGCACCATCACCAT<br><b>CACCATTAAgtaccggtcgaccattcaaa</b> | lower case for<br>plasmid overlap,<br>bolded is 6xH                                      | Insert<br>codon-<br>optimized<br>c11orf83_<br>6xH into<br>pBOMB |
| cls_TM_c11orf83<br>_6xH (pBOMB) | aaagaggagaaaggatctgcATGAAAATGG<br><u>CTTTTTTACGGAAAATATTTGTAT</u><br><u>TTGTAGCTTGTGTTGTCTCGTTGA</u><br><u>ATGGTTTTGCGCACACTGACTCAC</u><br>TCCGTAAGATGTTAATATCCGTCG                                                                                                                                                                                                                                            | lower case for<br>plasmid overlap,<br>underlined sequence<br>is cls_TM, bolded is<br>6xH | Insert<br>codon-<br>optimized<br>cls_TM_c1<br>1orf83_6x         |

|                             |                                                                                                                                                                                                                                                                                                                                                                                                                                                                                                                          |                                                                                                                                                                                                                                                        |                                                                                       |
|-----------------------------|--------------------------------------------------------------------------------------------------------------------------------------------------------------------------------------------------------------------------------------------------------------------------------------------------------------------------------------------------------------------------------------------------------------------------------------------------------------------------------------------------------------------------|--------------------------------------------------------------------------------------------------------------------------------------------------------------------------------------------------------------------------------------------------------|---------------------------------------------------------------------------------------|
|                             | CTATGCTTGGAGCTGGTGCAGGTG<br>TTGGCTACGCATTACTAGTTATCG<br>TGACCCCCGGCGAACGCAGAAAA<br>CAGGAAATGCTCAAGGAAATGCC<br>TTTACAGGACCCACGTTCAAGAG<br>AAGAAGCGGCCCGAACGCAACAG<br>TTACTCTTAGCAACCTTACAGGAA<br>GCTGCTACAACACAGGAGAATGT<br>TGCCTGGAGAAAAAATTGGATGG<br>TAGGTGGGGAAGGCGGTGCAGGT<br>GGAAGATCCCCGCACCATCACCA<br><b>TCACCATTA</b> Agtaccggtcgaccattcaaa                                                                                                                                                                       |                                                                                                                                                                                                                                                        | H into<br>pBOMB                                                                       |
| TM_c11orf83_6x<br>H (pBOMB) | gatctaaagaggagaaaggatctgcATGTTAAA<br><u>ATTTATTCTACGTCGCTGTCTGGA</u><br><u>AGCGATTCCGACGCTATTTATTCT</u><br><u>TATTACTATTTCGTTCTTTATGATG</u><br><u>CGCCTCGCGCCGGGAAGCCCTTTT</u><br><u>ACCGGTGGATCATTACTAGTTATC</u><br>GTGACCCCCGGCGAACGCAGAAA<br>ACAGGAAATGCTCAAGGAAATGC<br>CTTTACAGGACCCACGTTCAAGAG<br>AAGAAGCGGCCCGAACGCAACAG<br>TTACTCTTAGCAACCTTACAGGAA<br>GCTGCTACAACACAGGAGAATGT<br>TGCCTGGAGAAAAAATTGGATGG<br>TAGGTGGGGAAGGCGGTGCAGGT<br>GGAAGATCCCCGCACCATCACCA<br><b>TCACCATTA</b> Agtaccggtcgaccattcaata<br>tgt | lower case for<br>plasmid overlap,<br>underlined sequence<br>is oppB TM from <i>E.</i><br><i>coli</i> , italicized<br>sequence is GGS<br>linker, bolded is<br>6xH, c11orf83<br>sequence lacks any<br>predicted membrane-<br>targeting motifs<br>(ΔN23) | Insert<br>codon-<br>optimized<br>TM_c11or<br>f83_6xH<br>into<br>pBOMB                 |
| Ec_oppB_TM<br>(pBOMB)       | gatctaaagaggagaaaggatctgcATGTTAAA<br><u>ATTTATTCTACGTCGCTGTCTGGA</u><br><u>AGCGATTCCGACGCTATTTATTCT</u><br><u>TATTACTATTTCGTTCTTTATGATG</u><br><u>CGCCTCGCGCCGGGAAGCCCTTTT</u><br><u>ACCGGTGGATC</u> Aggcatggtcttaagggeg<br>aggaaga                                                                                                                                                                                                                                                                                      | lower case for<br>plasmid overlap,<br>underlined sequence<br>is oppB TM from <i>E.</i><br><i>coli</i> , italicized<br>sequence is GGS<br>linker                                                                                                        | Insert <i>E.</i><br><i>coli</i> OppB<br>1 <sup>st</sup> TM<br>domain<br>into<br>pBOMB |

- 1 Bauler, L. D. & Hackstadt, T. Expression and targeting of secreted proteins from *Chlamydia trachomatis*. *J Bacteriol* **196**, 1325-1334, doi:10.1128/JB.01290-13 (2014).
- 2 Lee, J., Cox, J.V., & Ouellette, S. P. Critical role for the extended N-terminus of chlamydial MreB in directing its membrane association and potential interaction with divisome proteins. *J Bacteriol* **202**, e00034-20 (2020).
- 3 Wood, N. A., Blocker, A. M., Seleem, M. A., Conda-Sheridan, M., Fisher, D. J., & Ouellette, S. P. The ClpX and ClpP2 orthologs of *Chlamydia trachomatis* perform discrete and essential functions in organism growth and development. *mBio* **11**, e02016-20 (2020).
- 4 Ouellette, S. P., Gauliard, E., Antosova, Z., & Ladant, D. A Gateway®-compatible bacterial adenylate cyclase-based two-hybrid system. *Environ Microbiol Rep* **6**: 259-267 (2014).
