# Supplementary material for: Localized cardiolipin synthesis is required for the assembly of MreB during the polarized cell division of Chlamydia trachomatis
Source: PubMed Central journal article supplement (PMC9499288; doi:10.1371/journal.ppat.1010836), 2022-09-12
Supplement: ppat.1010836.s002.pdf [file ppat.1010836.s002.pdf]

**A**

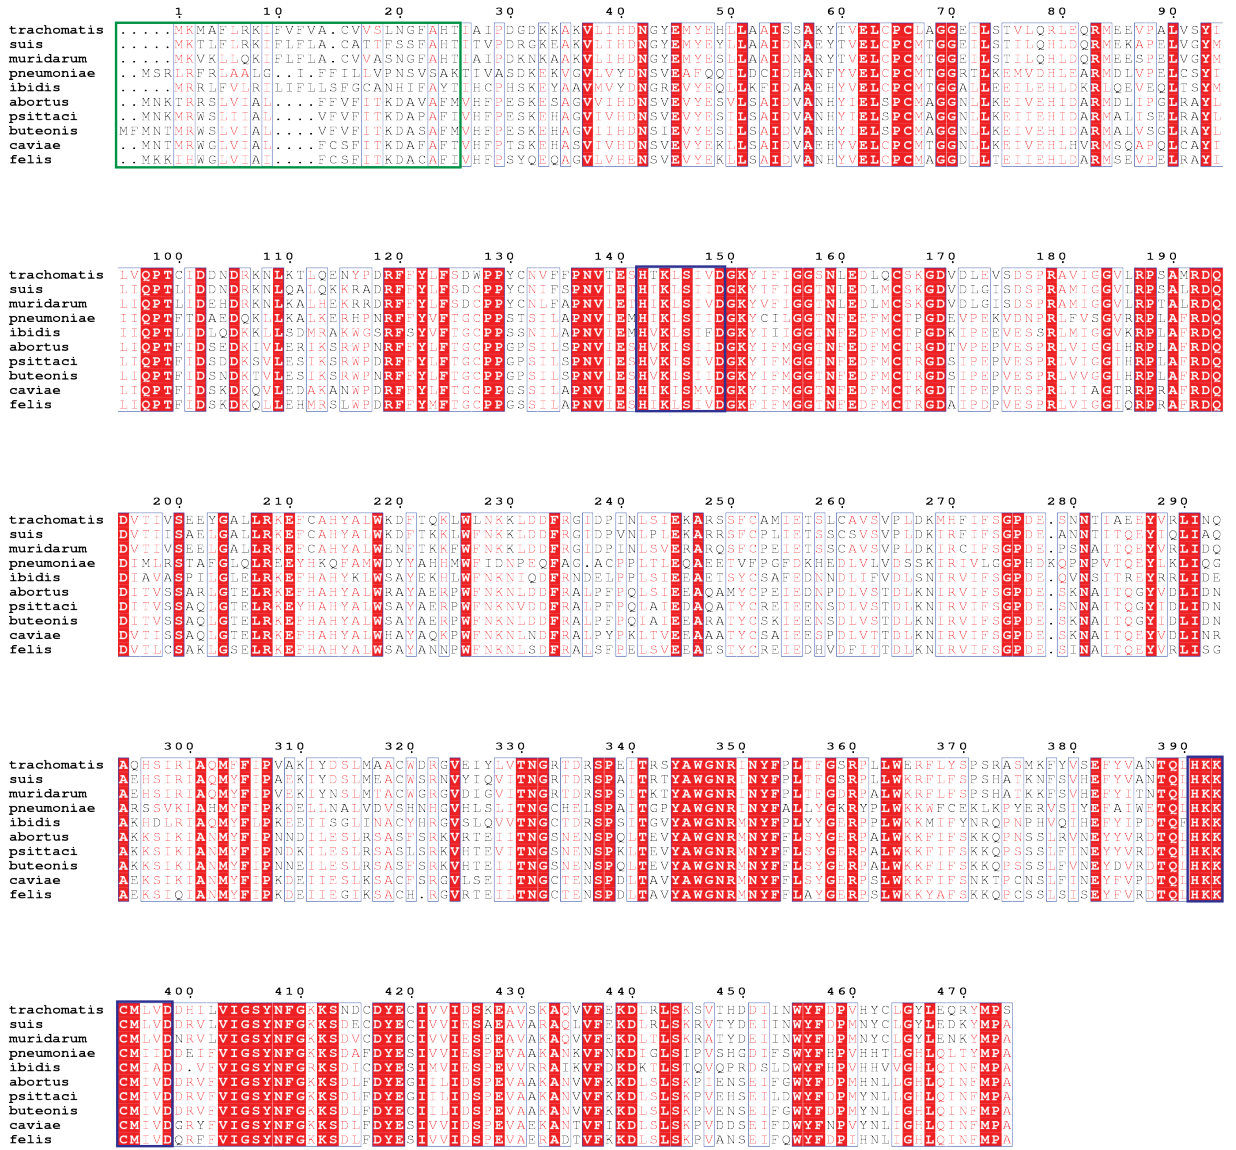

**B**

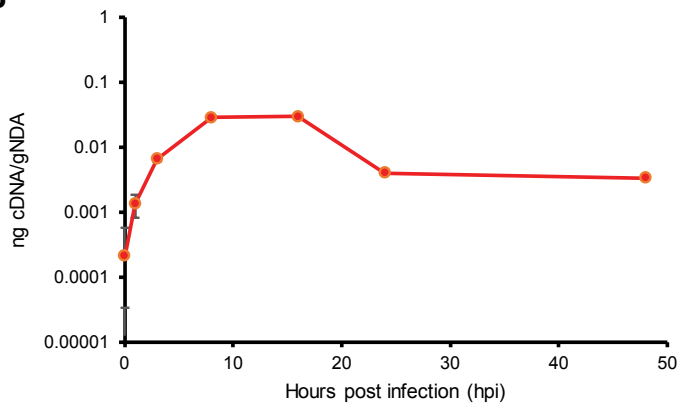

**S1 Fig**
